# Supplementary material for: Plasmonic gold nanoparticles for ZnO-nanotube photoanodes in dye-sensitized solar cell application
Source: Royal Society of Chemistry journal article supplement (doi:10.1039/c5nr08029k), 2015-12-10
Supplement: c5nr08029k1.pdf [file c5nr08029k1.pdf]

## Supporting Information

### Plasmonic Gold Nanoparticles for ZnO-Nanotube Photoanode in Dye Sensitized Solar Cell Application

Marwa Abd-Ellah, Nafiseh Moghimi, Lei Zhang, Joseph. P. Thomas, Donald McGillivray, Kam Tong Leung<sup>1</sup>

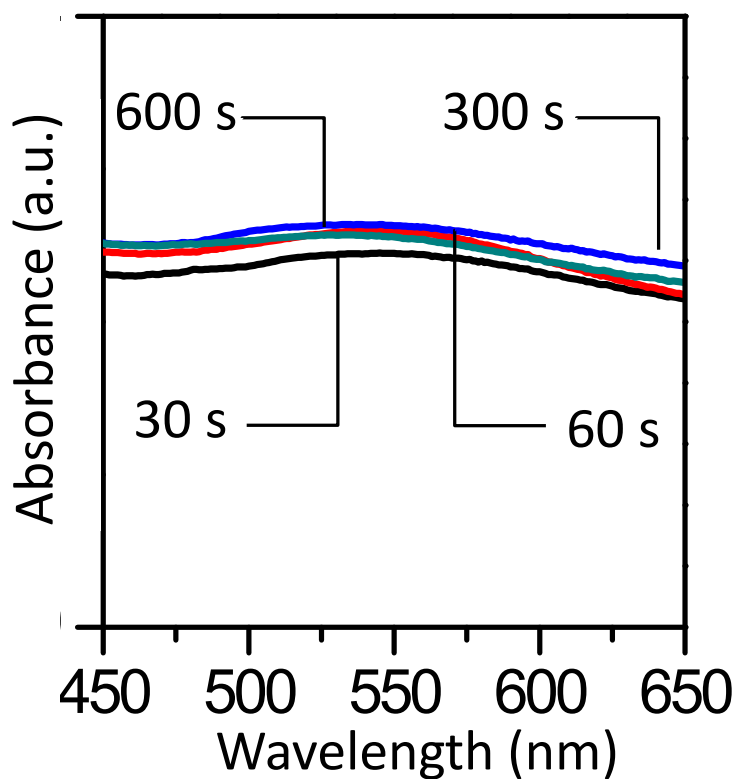

**Figure S1.** UV/Vis absorption spectra of GNP/ZnO-NT samples with GNPs obtained with deposition for 30, 60, 300, and 600 s, showing the similar absorbance in the visible region for deposition time above 300 s.

<sup>1</sup> E-mail: tong@uwaterloo.ca

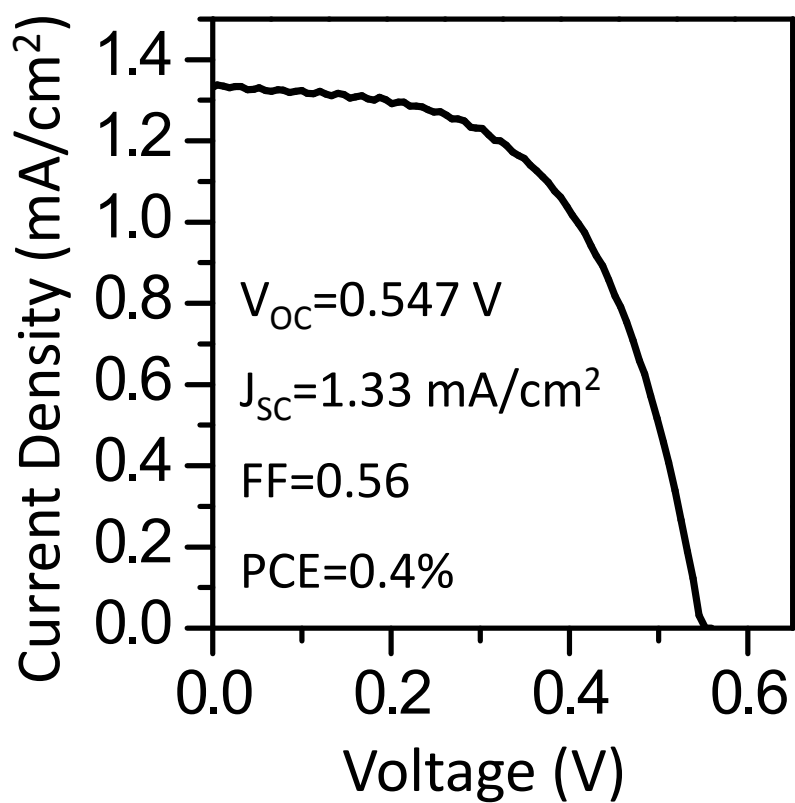

**Figure S2.** Current density vs voltage profile of GNP/ZnO-NT based DSSC with agglomerated GNPs obtained by using a 10 mM AuCl<sub>3</sub> electrolyte.

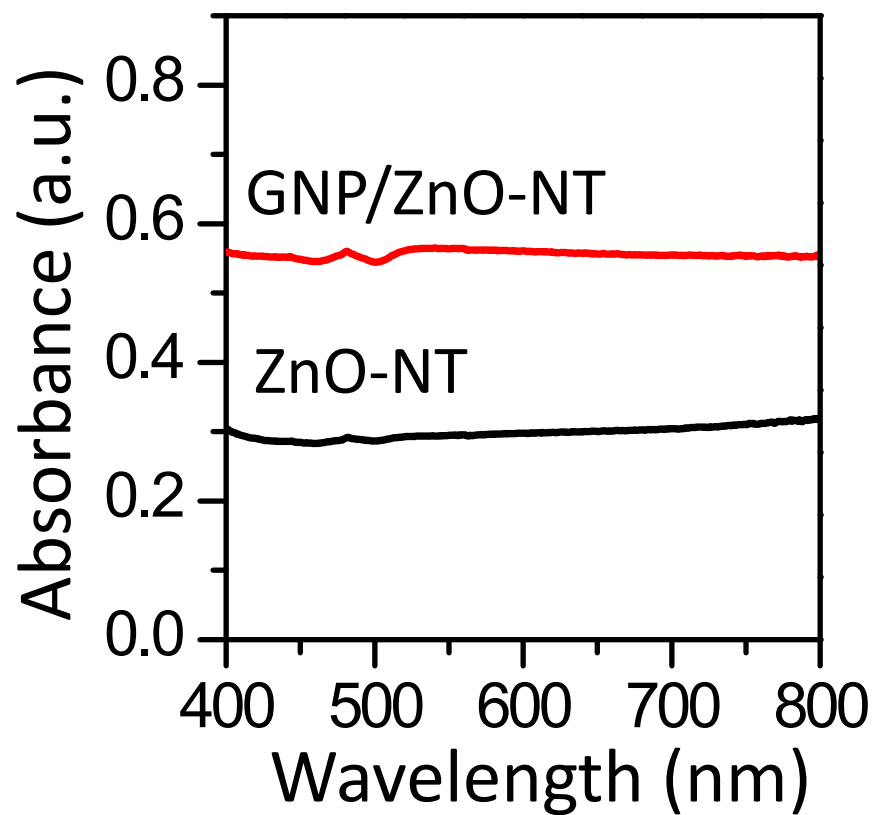

**Figure S3.** UV/Vis absorption spectra of pristine ZnO-NT and GNP/ZnO-NT samples, showing the higher absorbance in the visible region after the gold nanoparticle loading step even in the absence of the N719 dye.
